# Supplementary material
Source: Springer Nature journal article supplement (https://www.springermedizin.de/resource/supplementary/12967_2008_324_MOESM9_ESM.pdf/9576222)

**+ CsA**

**+BAF**

**BA**

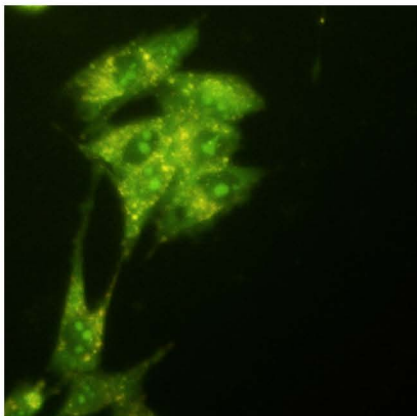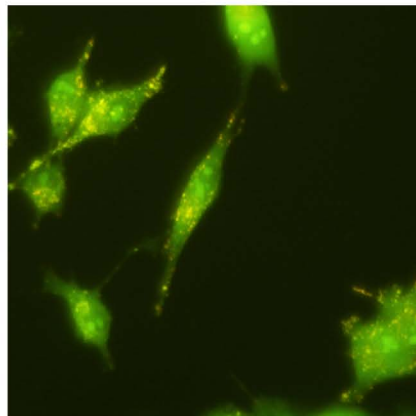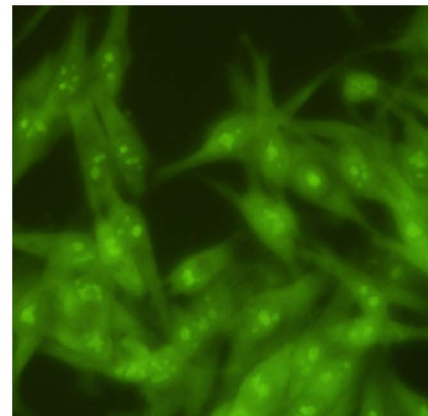

**DMSO**

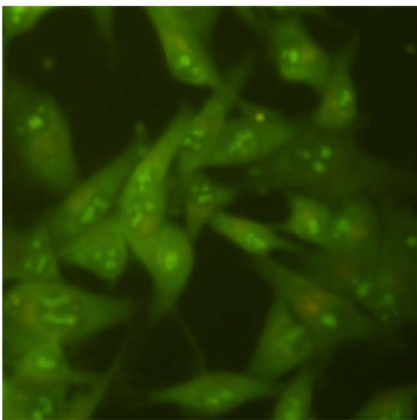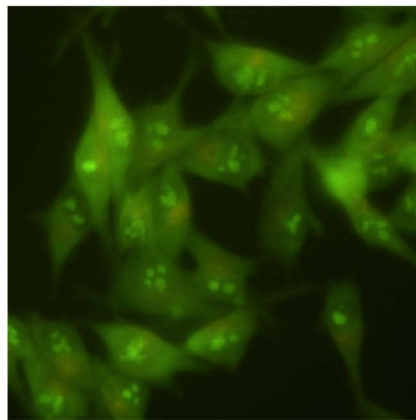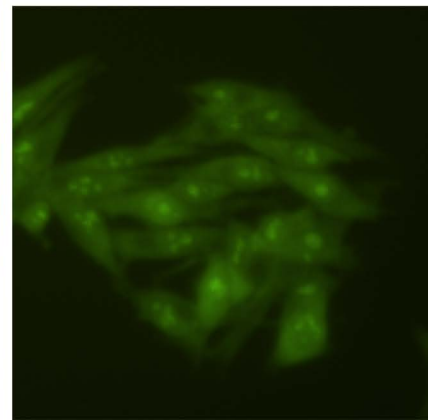

Supplement: MOESM9 [file 9576222]
